# Supplementary material
Source: publisher figshare collection journal article supplement (https://rs.figshare.com/ndownloader/files/31581039)
Supplement: Supplementary file 1 [file 31581039]

Supplementary Information

**Supplementary Methods**

We collected fine-scale network data concerning nine different types of fishing information at the small-scale fishing community in San Jose, Lambayeque, Peru (6°46' S 79°58' W). Sea turtles captured in gillnets are the marine group of primary conservation concern in San Jose; thus, information-sharing about sea turtle bycatch is one of the study’s primary interests. Nevertheless, the sea turtle bycatch reduction initiative (LEDs on gillnets) may potentially add value to catch (fishing finance), as well as relating to other types of fishing information shared, such as fishery regulations, weather conditions, crew management, and vessel technology and maintenance. Thus, nine individual information-sharing networks were assessed. This study aimed to investigate the social structure amongst skippers; therefore, the study’s data pertain to respondent-to-respondent networks only (which also allowed for consistent respondent numbers between cross-network comparisons).

The gillnet is the most common fishing gear used in Peru’s small-scale fishing fleet [1]. Several marine megafauna taxonomic groups are incidentally captured in gillnets in San Jose [2-5], of which sea turtles have been highlighted as a major conservation issue that warrants further management [2, 6]. Across the inshore-midwater vessel class in San Jose, sea turtle captures per trip has been calculated at 0.71 for green turtles (*Chelonia mydas*), 0.08 for olive ridley turtles (*Lepidochelys olivacea*), and 0.02 for leatherback turtles (*Dermochelys coriacea*). Turtles released alive without visible injury comprise nearly 62% of 461 fishing trips observed from San Jose between August 2007 to March 2019. Live releases with injuries 28% of captures and 8% mortalities [6]. Gillnetting across two distinct fleets in San Jose has been defined as posing an extreme and major risk to population recovery goals of the East Pacific Regional Management Unit (RMU) [7] populations of these species [6].

Because of the threat that gillnets pose to sea turtles in Peru's northern fishing ports, our chosen study population was actively fishing San Jose skippers deploying gillnet gear year-round, including those who owned and operated their vessels and those who skippered for others. Skippers were chosen as they are in charge of the fishing gear and crew when the boat is in the water and the gears deployed, and therefore their decisions are most influential in opportunities to reduce turtle bycatch (for example, through better live release, or the use of LED lights on nets to reduce incidental captures [8]).

Five gillnet skippers and their crew are currently involved in a trial community co-management bycatch reduction scheme operating from San Jose that requires fishers to use light-emitting diodes (LEDs) on their nets a technology shown to reduce green turtle bycatch by 64% while maintaining levels of target catch in randomised control gear trials in Sechura Bay (Main text Figure 2a), located approximately 150 kilometers north of San Jose [8]. Acoustic alarms (‘pingers’) are also fitted to nets to reduce small cetacean bycatch [4], and a remote electronic monitoring device is under trial to improve data paucity [9].

*Determining population size*

During months with warmer weather (and hence better fishing conditions), the number of skippers can more than double as fishers arrive from inland areas seeking fishing work. Skippers typically operate with 1–4 crew [10]. Peruvian law defines small-scale fishing vessels as displacing a maximum of 32.6m3 Gross Registered Tonnage (GRT), up to 15m in length, and operated predominantly manually. San Jose’s small-scale gillnet vessels can be subdivided into two fleets. The first fleet comprises a class of open-welled boats known as ‘chalanas’, with a capacity range from 1–8 t. The second fleet comprises a predominantly larger vessel class known as ‘lanchas’, with small closed bridges ranging in capacity from 5–32 t [1]. The survey interviewed actively fishing gillnet skippers on both chalana and lancha vessels. Previous estimates of gillnet activity in San Jose recorded 95 gillnet vessels fishing in January–April 2004 [10], and 47 gillnet vessels fishing in November 1995–April 1996 [11].

The total population (n=168) was determined by triangulating data obtained from membership lists of the two main fishing groups in San Jose, lists of vessels daily launching and landing logs, and key informant interviews. We restricted the network analysis to gillnet skippers – who owned their own vessel(s) or who skippered a vessel owned by someone else, and who launched and landed their vessels from the beach at San Jose, Lambayeque, Peru (6°46' S, 79°58' W). Gillnet skippers were required to be identified as actively fishing at least once during the winter period of 1 July – 30 September 2017 using one or more of the data sources used for the analysis.

There are two main at-sea fishing groups in San Jose (the Maritime Union of Fishermen Society, and the Artisanal Fishermen and Hydrobiological Extractors Association). Following initial introductions being made with both of the fishing groups leaders during which time we presented a description of the study and associated ethical clearance, we were granted access to the fishing groups membership lists, which contained information on gillnet skipper name, vessel name, and vessel unique identification (plate number). During our survey period, the fishers in San Jose were pushing and pulling their fishing vessels in and out of the water from the beach using large tractors that were driven by employees of a local company that specialised in providing this service. Subsequent information from San Jose in early 2019 indicates that this service is no longer being provided due to legal implications imposed by recently implemented Government legislation. Skippers were charged a fee and the tractor drivers record each vessel (using the plate number) as they are pushed each vessel out to sea and pulled each vessel back onto the beach following a fishing trip. The daily launching and landing logs were provided following a meeting with the company owner and the tractor drivers, during which we presented a description of the study and associated ethical clearance. The daily launching and landing logs were cross referenced with the list of active fishing group members and the list of actively fishing gillnet skippers was checked by several key informants during two key informant interviews held in San Jose in July 2017. Between 1 July – 30 September 2017 every actively fishing gillnet skipper (n=168) was identified and asked if they would like to partake in the interview; only three actively fishing gillnet skippers declined.

*Social Network Analysis structured questionnaire*

We surveyed with a fixed choice survey design, where respondents were asked to consider up to ten individuals with whom they exchange useful information about fishing and whom they considered valuable to their fishing success (see full questionnaire below). The decision to limit the number of skippers each respondent could specify was made for practical survey purposes as the network we surveyed was relatively large. The fixed-choice survey design also had the secondary benefit to help respondents understand what is required of them during the survey, as a free-choice survey design can result in subjective interpretations of the desired ties [12]. While the number of outgoing ties was limited to ten, there was no limit on the number of incoming ties in the network (i.e., there was no limit to the number of times others could nominate a skipper), which was the main focus of our analysis.

All respondents were interviewed verbally using a face-to-face interview format. Respondents were asked to consider people from San Jose that they share useful information about fishing with; considering those that they thought may influence their fishing success. Respondents were reminded that the shared information and names will remain anonymous and will not be revealed. We highlighted that the information provided will help us understand how information that relates to fishing flows between fishers. Prior to the fixed response, respondents were asked to consider relationships that they have had with other vessel owners, captains, owner/captains (owners who also captain their vessel), other fishery leaders, fishery management officials, members of the scientific or not-for-profit community, boat launching / landing support, fish transport associations, fish sellers/market operators, their family and friends, and any other people they have fished with, or shared information with about fishing over the last 5 years.

We classified two broad categories about which we expect gillnet skippers to exchange fishing related information. These include 1) the process of fishing, and 2) the business and governance of fishing. We then disaggregated these two broad categories into nine fine-scale information-sharing types that relate to fishing, including i) turtle bycatch, ii) gillnet type and maintenance, iii) weather conditions, iv) fish location and catch sites, v) fishing activity (how many people are fishing, who is fishing, who caught what), vi) vessel technology and maintenance, vii) fishing regulations (laws and rules), viii) fishing finances (market prices, loans, fines, penalties), and ix) crew management. Fishing information categories were randomised before interviewing each respondent using a random number generator. Respondents were not shown the reporting table used by the interviewers to records each respondent’s responses (Q25 of the social network questionnaire).

Respondents were requested to indicate their age – those that reported that they were under the age of 18 were to be excluded, however, no actively fishing gillnet skippers were under 18 in the community. Respondents were debriefed after completing the survey, or if they choose to leave the survey before completing it. This debrief included the contact details of the research team, and the Ethical Review Board, and the suggestion to seek support if affected by questions in the survey. This research has Research Ethics Approval (CUREC 1A; Ref No: R52516/RE001 and R52516/RE002).

*Assessing cross-network correlations using null models*

The basic properties of each information-sharing network, and the nomination structure in general, will have a larger deterministic influence on the cross-network correlations. For instance, considering a network of ‘any nomination in any information-sharing network’, we would expect each network to hold a correlation equal to that of the number of nominations in each network (Fig. S7). Similarly, networks with similar numbers of nominations are more likely to be more correlated with one another than those with very different numbers of nominations. Simply carrying out edge-permutations, even conservative ones controlling for the number of nominations, or degree distributions, for example, would, by definition, randomise the underlying dyadic structure (who can nominate who) and thus means all observed cross-network correlations would differ largely from expected under this null model just due to this alone. To infer the extent to which networks are more, or less, similar than expected under the general dyadic social structure, we carried out a cross-network null model: For each dyadic nomination across any of the networks, we randomised the networks that these nominations were made within. For instance, when individual X nominated individual Y for information sharing within three different networks, we allowed these three nominations to be reassigned to any of the networks, but all three still in the direction of individual X nominating individual Y within these networks. In this way, the overall dyadic nomination structure was maintained, but the networks within which these dyadic nominations took place within were randomised. Using this method (termed ‘cross-network null model 1’ – Main text Figure 1c), 1000 permuted networks were generated, and the distribution of the expected cross-network correlations was recalculated using this.

As an even more conservative version of a cross-network null model, we created a new version of these permutations and controlled for the number of nominations that took place overall within each network. For instance, when individual X nominated individual Y for information sharing within three different information-sharing networks, these three nominations were reassigned amongst the networks in a way that was equal to the number of nominations in each network. For example, if network A had twice as many nominations in total as network B, reassigning a nomination between individual X and individual Y would be twice as likely to be reassigned within the network A than the network B. This permutation was done by merely swapping individual network nominations between dyadic nomination pairs. This permutation is similar to a group-by-individual permutation [13] but where the rows of the matrix were set as the individual-to-individual dyadic nominations, and the columns were set as each of the information-sharing networks. Using this permutation procedure (termed cross-network null model 2 – Main text Figure 1d), we generated 1000 permuted networks (with 100 swaps between each network and a burn-in of 2000 swaps; Fig. S8) and then calculated the distribution of the expected cross-network correlations under this null expectation.

**Supplementary Results**

*Network summary statistics*

While the current study’s focus is not on the broader network of non-skipper outgoing ties, our analysis showed the number of information-sharing ties remained consistent between the respondent-to-respondent network and the broader network that includes non-skipper nominees. Our analysis showed that across nine different information-sharing networks evaluated, turtle bycatch remained the least discussed type of fishing information in the wider network (in 64.2% of possible nominations). Information about the weather and fishing activity were discussed the most (with 95.7% and 95% of possible ties, respectively). Turtle bycatch and fishing regulations were the only two information-sharing networks that had a relative increase (both by 3%) in the amount they were discussed in the wider network, compared to the respondent-to-respondent network that contained only skippers (Table S1b).

*Structural differences between information-sharing networks*

Degree assortativity

Our analysis of network degree assortativity (presented in the main text and akin to degree homophily) found that networks of sea turtle bycatch information sharing nominations show no significant degree assortativity in comparison to both the edge permutation null models (Main text Figure 2c). Individual gillnet skippers had a propensity to be disproportionately connected to other gillnet skippers who had nominated a similar number of people as they had (out-degree assortativity). Although none of the information-sharing networks were significantly different from the edge null models in their out-degree assortativity, the sharing of information regarding sea turtle bycatch was the only network that was slightly lower than expected, whilst all other networks were higher than expected (Fig. S2 and Table S2). The lack of significant differences here is probably due to the relatively low variance in outgoing ties in comparison to incoming ties (i.e., due to the questionnaire set-up the number of nominations an individual could make was limited – see Main text, Methods), and is most likely driven by a carry-over of the strong patterns evident in the incoming nomination assortativity.

Our analysis shows that the lack of degree assortativity in the turtle bycatch context is most likely a result of more complex dyadic-level behavior patterns driving each individual’s attitudes and behaviors. This is because the degree assortativity statistic itself is the level of like-to-like connectivity given the total number of ties. The edge permutations (edge null model 2) also (a) directly control for the number of outgoing and incoming ties in each information-sharing network (Main text Figure 2d), and (b) still find that degree assortativity is not significantly different in the sea turtle network, but significantly differently in the other fishing information-sharing networks. These comparisons are over and above that which would be expected from the differences in the number of ties, or even the degree distributions, specific to each network assessed.

Individual Centrality

As we aimed to examine the use of social network analysis for conservation-relevant systems, we did not want to use simple node-level metrics that can be inferred without building social networks (e.g., using ‘degree’ is simply equivalent to counting the number of nominations an individual receives and requires no knowledge of the network structure).

When considering the variance in betweenness as an alternative, but related, measure of centrality which is positively correlated with eccentricity but negatively correlated with the clustering coefficient (Fig. S3), or the mean eccentricity of each network’s nodes (rather than the variance; Fig. S4), we found that the observed statistics from all networks (including sea turtle bycatch) were lower (and mostly strongly significantly lower) than the statistics generated from edge null model 1. This is most likely due to the random reassignment of incoming ties in this permutation causing (i) the assignment of incoming ties to nodes which are originally disconnected in this context and thus increasing the mean and (ii) the randomisation of the incoming degree distribution increasing the betweenness variance.

Seven of the nine information-sharing networks fell within the expected range of both the edge model permutations for node eccentricity (how far a fisher is from the furthest other), with bycatch and fishing activity the only exceptions. We found that the observed variance in node eccentricity (Fig. S5) was lower than expected for information sharing regarding sea turtle bycatch, in comparison to the null distributions (generated from the context permutations), which had higher than expected observed variance in node eccentricity. The opposite was true for fishing activity. The observed mean node eccentricity (Fig. S6) followed a similar pattern to the variance in node eccentricity, with information sharing regarding sea turtle bycatch being the only network that was lower than expected in comparison to the null distributions. Mean node eccentricity for information sharing regarding fishing activity illustrated the greatest contrast to the sea turtle bycatch network with higher than expected observed statistics. This supplementary analysis demonstrates that the sea turtle bycatch information-sharing network holds some structural dissimilarities in mean node eccentricity, not only when being compared to the edge null models (Main Text Figure 3), but also given the underlying social structure of who is connected to who within the network.

*Cross-network correlations of dyadic ties*

Along with focussing on the ability of each fishing information-sharing network to correlate to sea turtle bycatch information-sharing ties, we also considered the correlation between all networks and how these differed from the correlations expected under the cross-network permutation null models (Fig. S9). We found that the dyadic directed ties within the ‘technology’ information-sharing network was more correlated with all the other networks than expected under the general social structure of the network. This suggests that the technology information-sharing network was particularly predictive of fishing activity in general.

As expected, when comparing the correlations to those generated from edge-permutations (rather than cross-network permutations), the observed statistics were vastly different even though these permutations were controlling for the number of nominations, degree distributions etc. due to randomising the underlying dyadic social structure (in terms of who can nominate who) (Fig. S10).

**Figure S1. Illustrative network of the structure of information sharing across nine types of fishing information sharing.** Thenodes show each of the skippers and the adjoining lines show which dyads shared information in at least one network, and nominations within the focal network (as indicated by heading) is highlighted as a directed red arrow here (arrow points to the one that was nominated). Node size and shading shows the number of nominations each individual received for the focal network (largest and most red = most nominations, small and grey = no nominations). Layout was set as a spring layout of edges within each focal network (to minimise overlap).


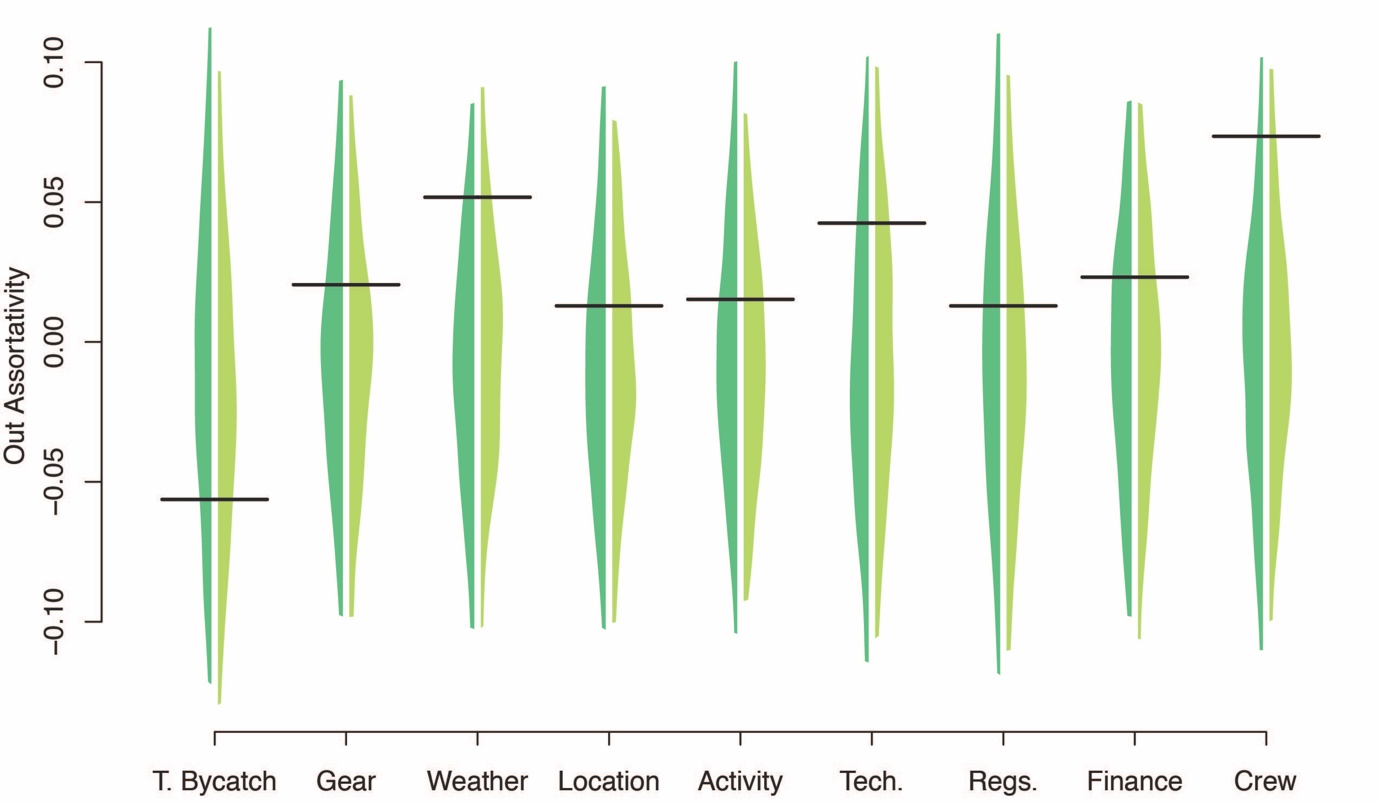


**Figure S2.** **The observed assortativity coefficient for outgoing ties in comparison to the null distributions for the different information-sharing networks.** Horizontal lines show the observed values from the actual networks (black = observed values are within the range of the permutations). Polygon distributions show those generated by permutations (dark green = outgoing edge permutation that maintains the no. of nominations each individual makes, light green = edge permutation that maintains the no. of nominations each individual makes and also the number of times each individual was nominated). Outgoing ties also show the same pattern seen in figure 1 (i.e., the turtle bycatch network is the only information network measured which is not positively homophilous) but with no significant difference. For details on types of fishing information refer to Table 1 in the main text.

**
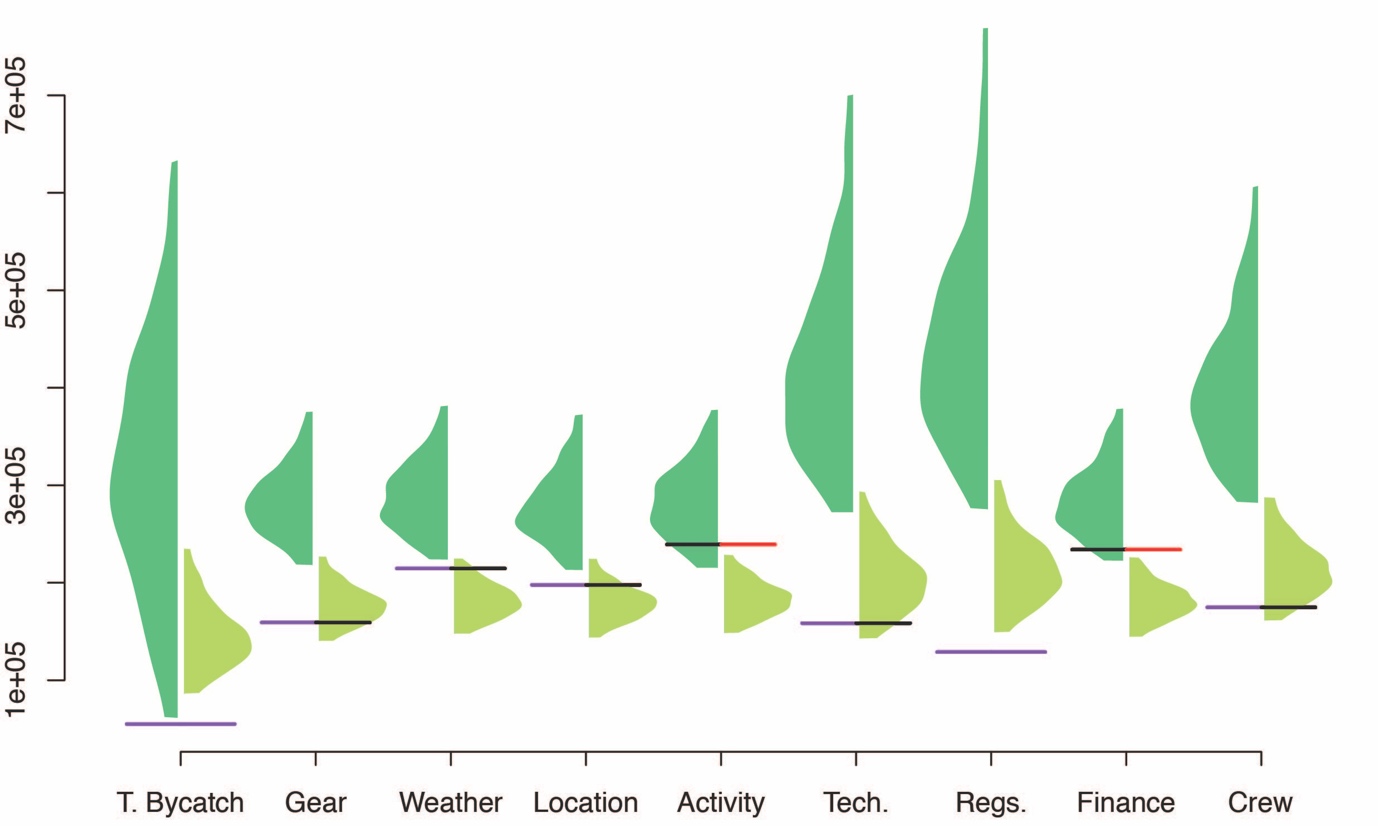
**

**Figure S3. The observed variance in node betweenness in comparison to the null distributions for the different information-sharing networks.** Horizontal lines show the observed values from the actual networks (red = observed values are above the permutations, black = observed values are within the range of the permutations, purple = observed values are below the permutations). Polygon distributions show those generated by permutations (dark green = outgoing edge permutation that maintains the no. of nominations each individual makes, light green = edge permutation that maintains the no. of nominations each individual makes and also the number of times each individual was nominated). Here a similar pattern to the degree assortativity (homophily) coefficient is also seen. For details on types of fishing information refer to Table 1 in the main text.

**
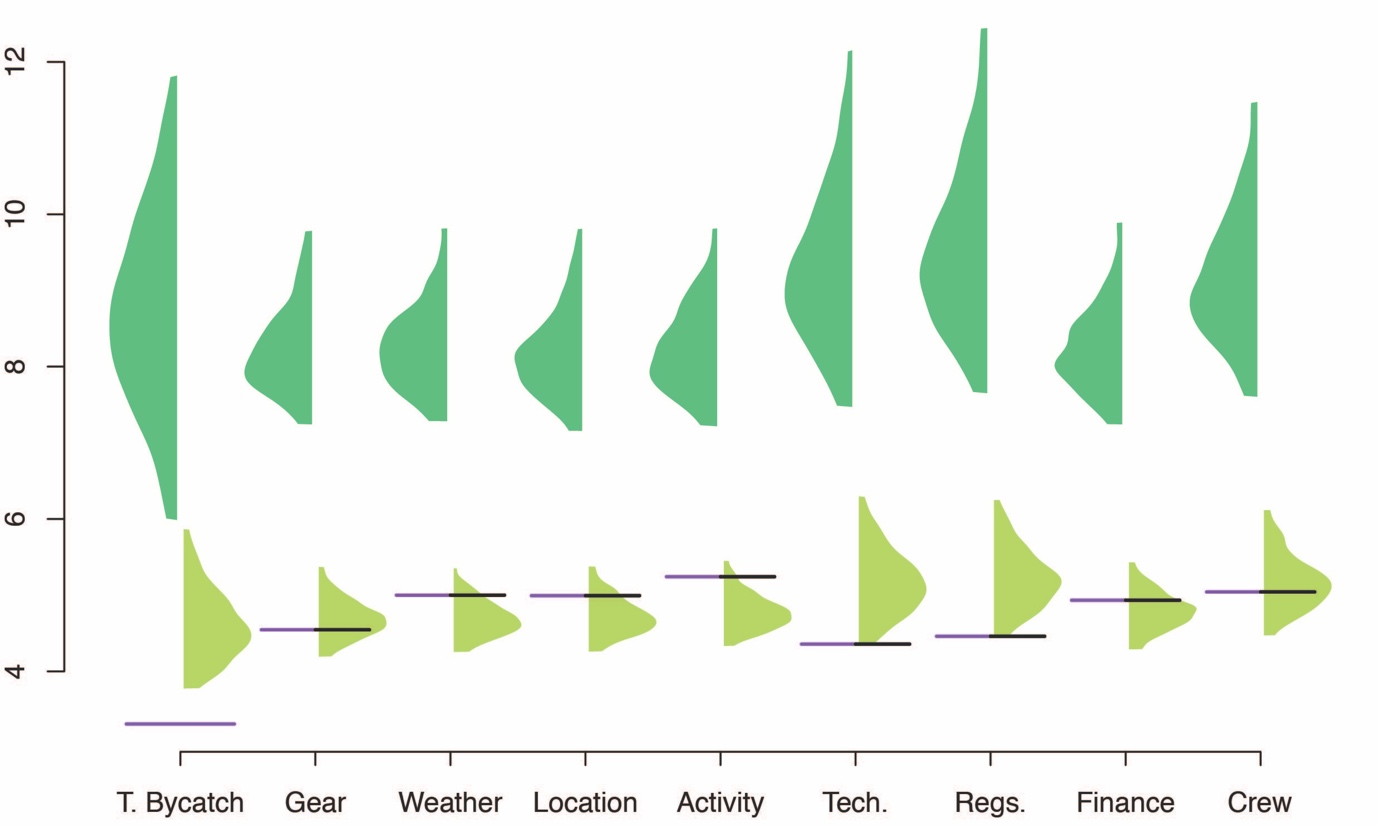
**

**Figure S4.** **The observed mean node eccentricity in comparison to the null distributions for the different information-sharing networks.** Horizontal lines show the observed values from the actual networks (black = observed values are within the range of the permutations, purple = observed values are below the permutations). Polygon distributions show those generated by permutations (dark green = outgoing edge permutation that maintains the no. of nominations each individual makes, light green = edge permutation that maintains the no. of nominations each individual makes and also the number of times each individual was nominated). Here a similar pattern to the degree assortativity (homophily)coefficient is also seen. For details on types of fishing information refer to Table 1 in the main text.

**
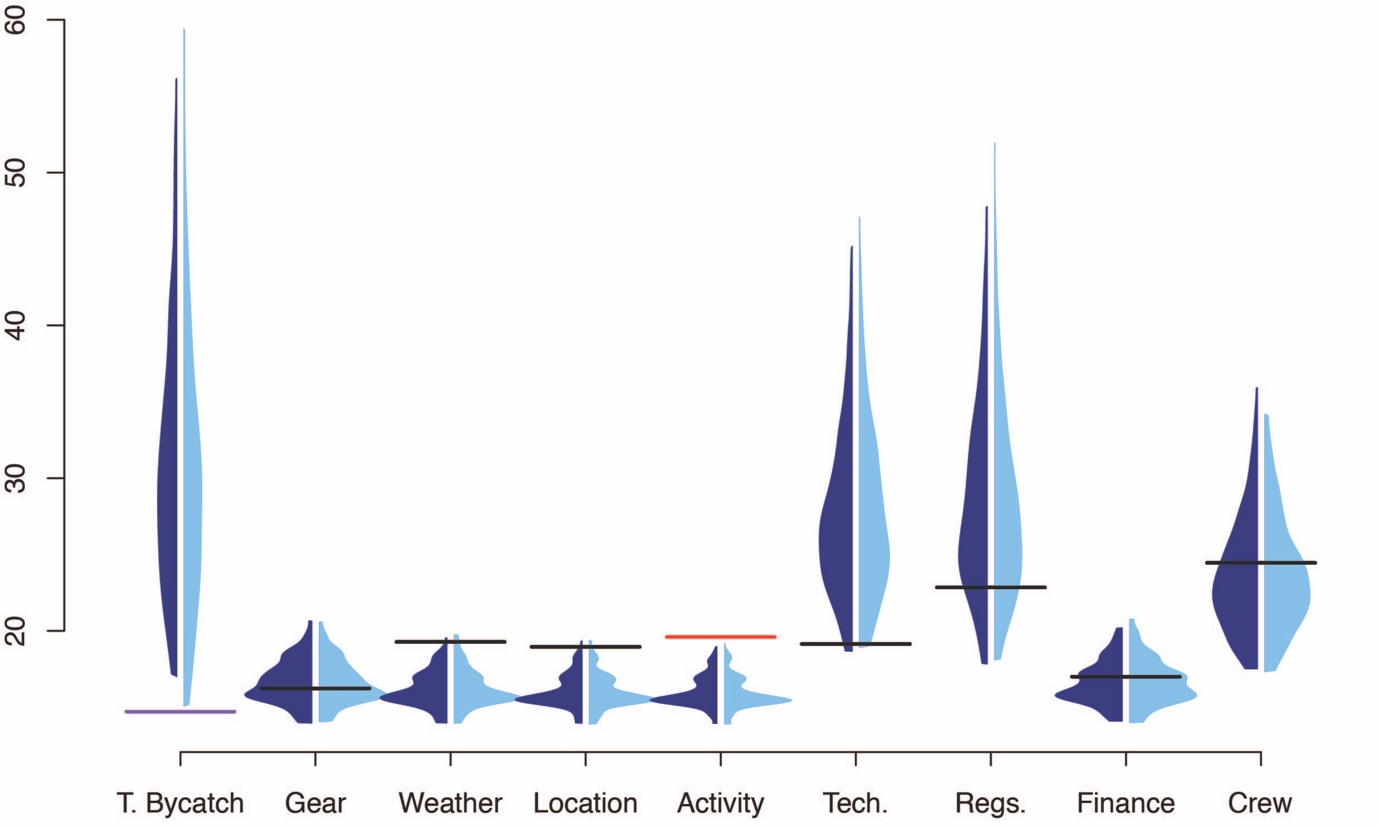
**

**Figure S5. The observed variance in node eccentricity in comparison to the null distributions (generated from the cross-network permutations) for the different information-sharing networks.** Horizontal lines show the observed values from the actual networks (red = observed values are above the permutations, black = observed values are within the range of the permutations, purple = observed values are below the permutations). Polygon distributions show those generated by permutations (dark blue = cross-networkswap that maintains the no. of nominations each individual makes and also the number of times each individual was nominated, but swaps the network these were made within whilst maintain the number of times each network was nominated as overall, light blue = conservative cross-networkswap that is the same as dark blue, but also maintains the number of networks each dyad nominated each other for – but changes those networks (same as a gbi permutation but on the dyad-by-network edges). For details on types of fishing information refer to Table 1 in the main text.

**
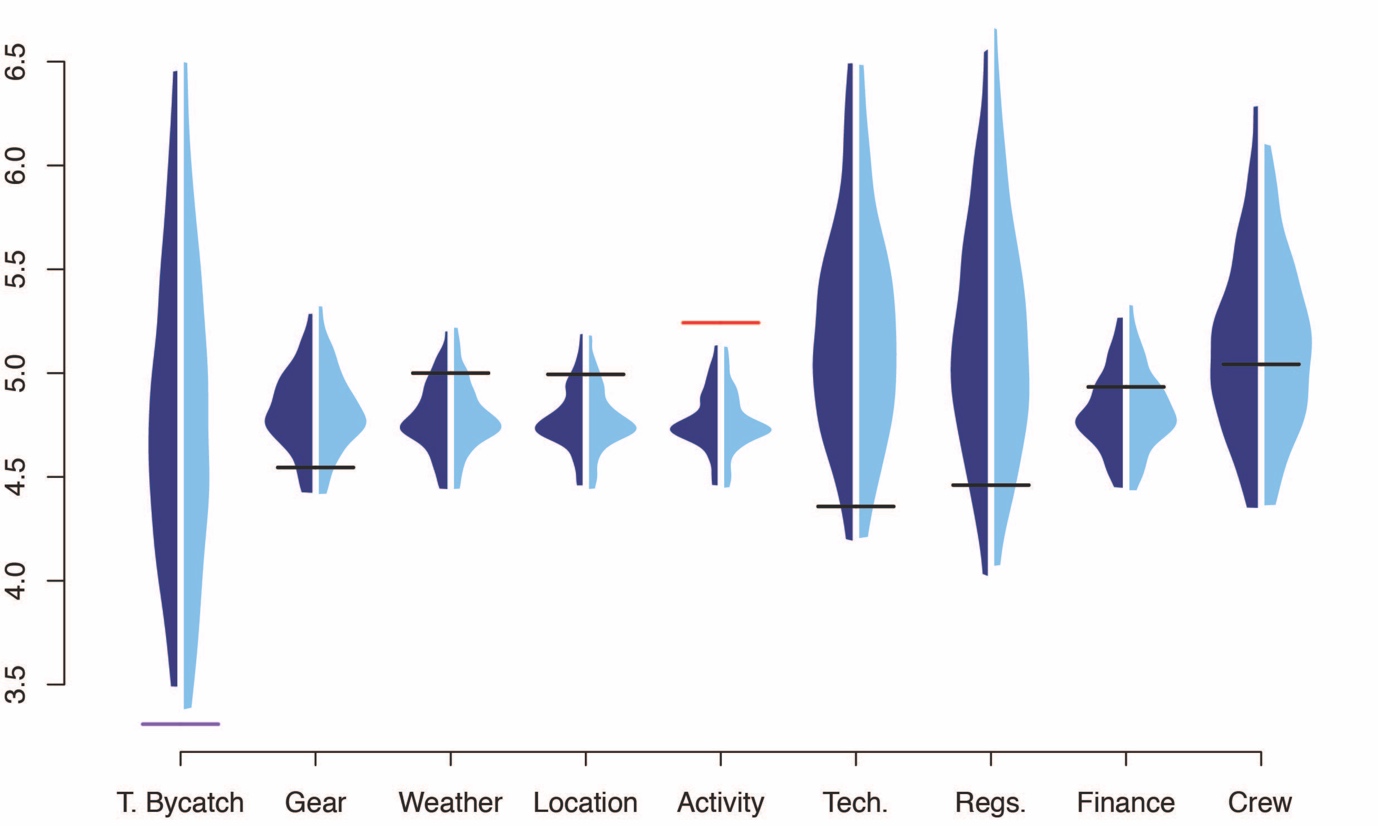
**

**Figure S6. The observed mean node eccentricity in comparison to the null distributions (generated from the cross-network permutations) for the different information-sharing networks.** Horizontal lines show the observed values from the actual networks (red = observed values are above the permutations, black = observed values are within the range of the permutations, purple = observed values are below the permutations). Polygon distributions show those generated by permutations (dark blue = cross-network swap that maintains the no. of nominations each individual makes and also the number of times each individual was nominated, but swaps the network these were made within whilst maintain the number of times each network was nominated as overall, light blue = conservative cross-network swap that is the same as dark blue, but also maintains the number of networks each dyad nominated each other for – but changes those networks (same as a gbi permutation but on the dyad-by-context edges). For details on fishing information refer to Table 1 in the main text.

**Figure S7. Network differences to the ‘any’ nomination network.** Differences seen between different networks in how predictive/correlated they are to the ‘any’ nomination network (lines show bootstrap). For details on information-sharing networks see main text Methods – Experimental Design –Table 1.

**Figure S8.** **Output for evaluation of cross-network** **null model 2.** This permutation procedure required sequential swaps of the networks in which nominations occurred between dyads (see supplementary information - methods - Assessing cross-network correlations) to generate the null networks. The y-axis illustrates the number of nominations between individual-to-individual dyads that are in the same network as those in the observed data, and the x-axis shows the number of swaps that took place during the permutation procedure. The long vertical blue line indicates the burn-in period for the randomisation swaps (2000 swaps before a null network was stored) and the short vertical blue lines show the points at which the following 999 null networks were stored (i.e., every 100 swaps).

**
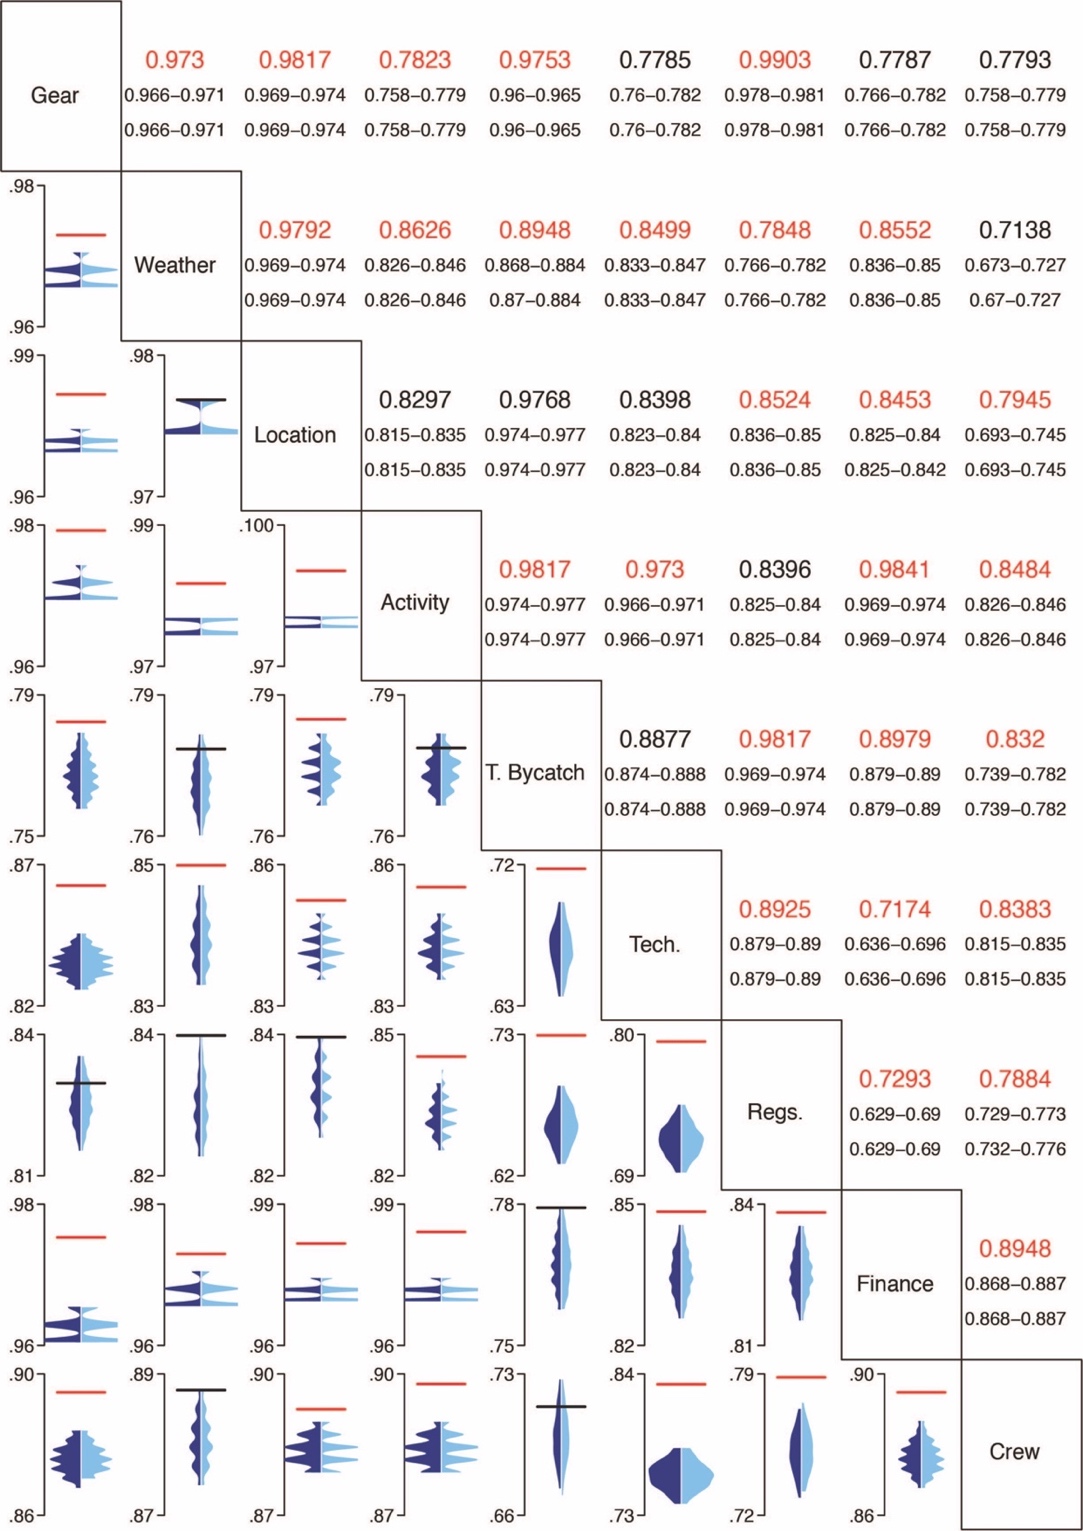
**

**Figure S9. Observed correlation (and the correlation expected from the cross-network permutations) between all of the information-sharing networks.** Horizontal lines show the observed values from the actual networks (red = observed values are above the permutations, black = observed values are within the range of the permutations). Polygon distributions show those generated by permutations (dark blue = cross-network swap that maintains the no. of nominations each individual makes and also the number of times each individual was nominated, but swaps the network these were made within whilst maintain the number of times each network was nominated as overall, light blue = conservative cross-network swap that is the same as dark blue, but also maintains the number of networks each dyad nominated each other for – but changes those networks (same as a gbi permutation but on the dyad-by-network edges). For details on information-sharing networks refer to Table 1 in the main text.


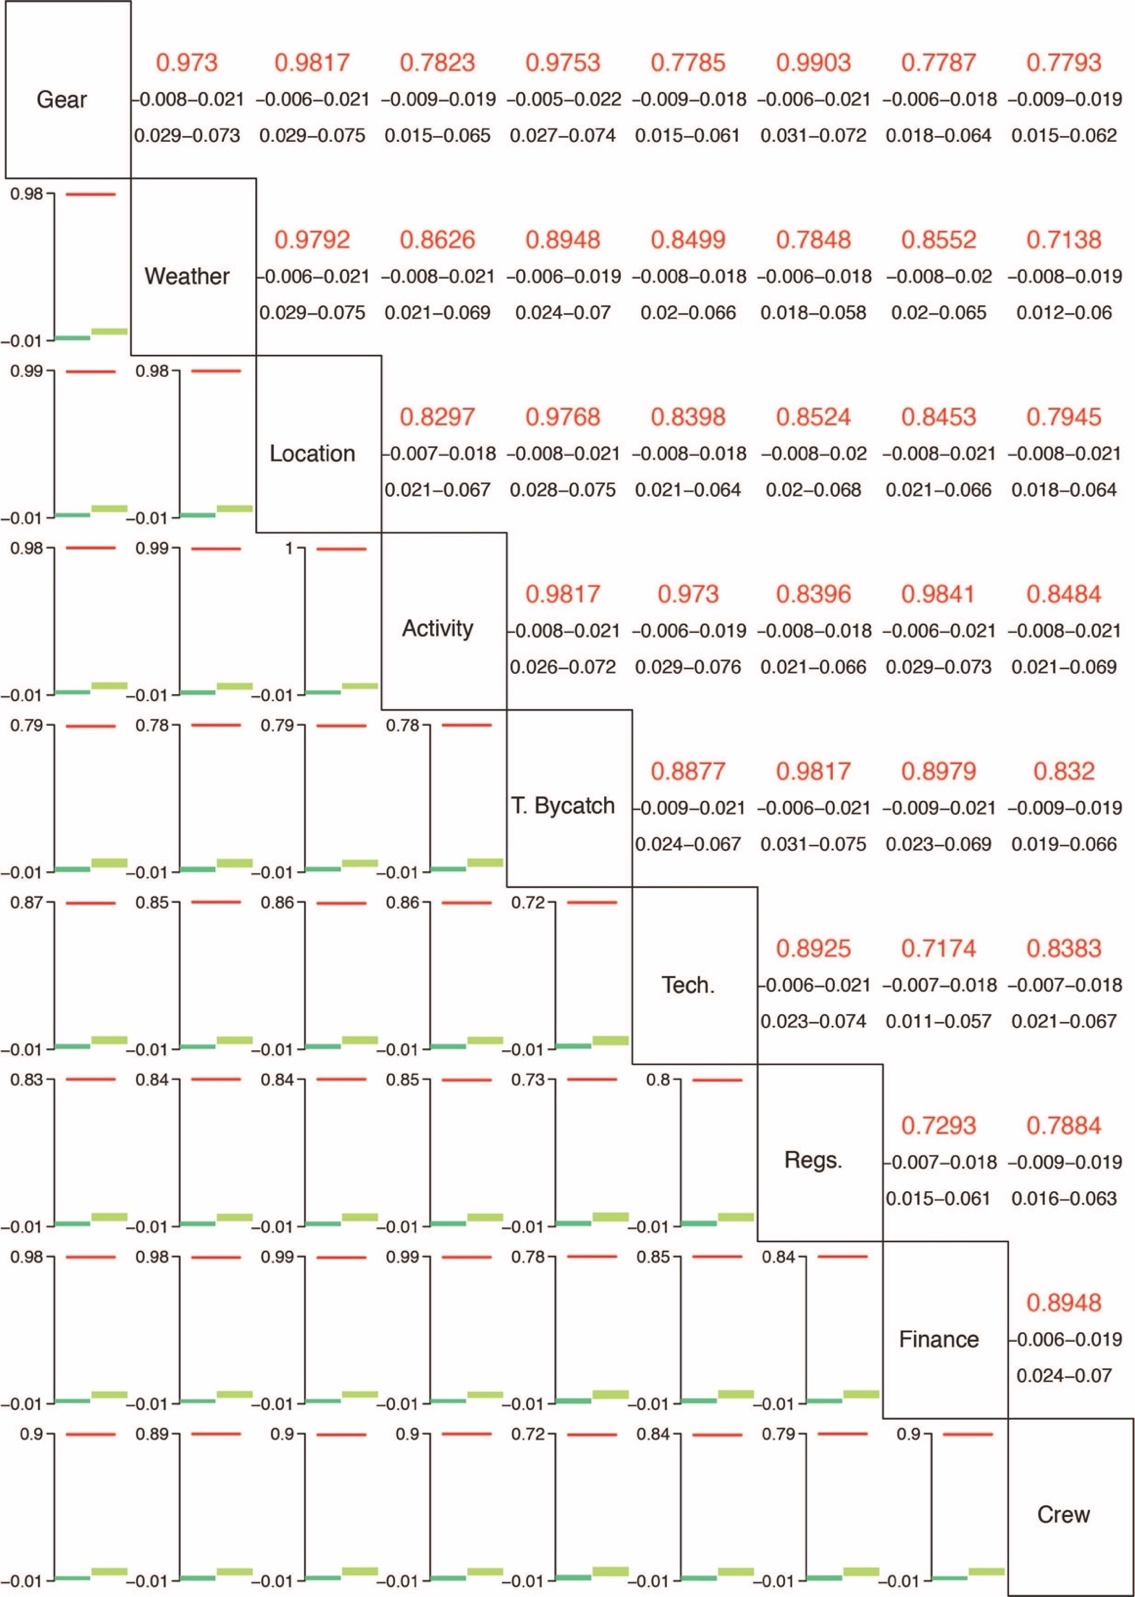


**Figure S10.** **Observed correlation (and the correlation expected from the edge permutations) between all of the information-sharing networks.** Horizontal lines show the observed values from the actual networks (red = observed values are above the permutations). Polygon distributions show those generated by permutations (dark green = outgoing edge permutation that maintains the no. of nominations each individual makes, light green = edge permutation that maintains the no. of nominations each individual makes and also the number of times each individual was nominated). For details on information-sharing networks refer to Table 1 in the main text.

**Table S1. Respondent-to-respondent network summary statistics.** Respondents nominated up to 10 individuals that included other skippers in their community but also non-skipper community members that might be deemed valuable to their fishing success. This study only analysed respondent-to-respondent data but the full network ties (i.e., skipper to any relation ties) across information-sharing networks are included in table section B.

| *(A) Respondent-to-respondent network data* |  |  |  |
| --- | --- | --- | --- |
|  | Number | |  |
| Total no. of ties within all networks | 3720 |  |  |
| Total no. of ties of one or more networks | 427 |  |  |
| Total no. of eligible respondents for survey | 168 |  |  |
| Total no. of respondents surveyed | 165 |  |  |
| Levels of information-sharing networks | 9 |  |  |
| Mean number of networks nominated per nominee | 7.7 |  |  |
| Mean incoming ties of one or more network per respondent | 3.7 |  |  |
| Mean outgoing ties of one or more network per respondent | 2.8 |  |  |
| Range of networks nominated per nominee | 1 to 9 |  |  |
| Range of outgoing ties of one or more network | 1 to 8 |  |  |
| Range of incoming ties of one or more network | 1 to 15 |  |  |
|  |  |  |  |
| *(B) Ties across networks* | |  |  |
|  | Resp-resp | Full network |  |
| All | 427 | 1102 |  |
| Fish location & catch sites | 418 | 1033 |  |
| Fishing activity | 418 | 1047 |  |
| Weather conditions | 415 | 1055 |  |
| Gear type | 411 | 1029 |  |
| Fishing finances | 411 | 1020 |  |
| Captain hiring crew and managing them | 342 | 868 |  |
| Vessel technology & maintenance | 311 | 807 |  |
| Fishery regulations | 304 | 822 |  |
| Sea turtle bycatch | 263 | 708 |  |

**Table S2. Measures of network structure with statistics describing the in-degree assortativity coefficient (in assort) and variance eccentricity (var eccent).** Table includes the observed statistic and the statistic from the permutations as the mean, sd, 95% range from 2.5% (lq) to 97.5% (uq), and the p value (when compared to the observed stat).

| stat | network | obs1 | mean.sd.1 | lq.uq.1 | p1 | mean.sd.2 | lq.uq.2 | p2 |
| --- | --- | --- | --- | --- | --- | --- | --- | --- |
| in assort | T.bycatch | 0.0377 | -0.0049 (0.0593) | -0.1228 to 0.1047 | 0.512 | -0.0107 (0.0593) | -0.1316 to 0.1041 | 0.39 |
| in assort | Gear | 0.105 | -0.0034 (0.0481) | -0.0921 to 0.0963 | 0.034 | 0.0052 (0.0486) | -0.088 to 0.1028 | 0.04 |
| in assort | Weather | 0.0932 | -0.0089 (0.0494) | -0.1113 to 0.0882 | 0.044 | 0.0032 (0.0485) | -0.0859 to 0.0983 | 0.068 |
| in assort | Location | 0.1069 | -0.005 (0.0471) | -0.095 to 0.0858 | 0.016 | 0.0057 (0.0467) | -0.0813 to 0.096 | 0.022 |
| in assort | Activity | 0.1038 | -0.0048 (0.0452) | -0.0944 to 0.0822 | 0.022 | 0.004 (0.047) | -0.0885 to 0.1024 | 0.042 |
| in assort | Tech | 0.1143 | -0.0091 (0.0547) | -0.1108 to 0.1041 | 0.032 | 0.0087 (0.0565) | -0.0982 to 0.1189 | 0.064 |
| in assort | Regs | 0.1246 | -0.0051 (0.0566) | -0.113 to 0.1077 | 0.02 | 0.0038 (0.0507) | -0.0953 to 0.1038 | 0.026 |
| in assort | Finance | 0.1002 | -0.0056 (0.0481) | -0.0995 to 0.0915 | 0.036 | 0.0049 (0.0473) | -0.0882 to 0.0976 | 0.048 |
| in assort | Crew | 0.1891 | -0.0084 (0.0528) | -0.109 to 0.0956 | 0 | 0.0198 (0.0525) | -0.0821 to 0.1247 | 0 |
| var eccent | T.bycatch | 14.71 | 41 (13.5) | 22.41 to 73.73 | 0.006 | 22.66 (5.335) | 15.58 to 36.53 | 0.02 |
| var eccent | Gear | 16.24 | 8.819 (2.326) | 5.209 to 14.11 | 0.016 | 12.84 (1.592) | 10.67 to 16.65 | 0.066 |
| var eccent | Weather | 19.28 | 8.717 (2.206) | 5.101 to 13.63 | 0.004 | 12.76 (1.563) | 10.77 to 16.56 | 0.012 |
| var eccent | Location | 18.96 | 8.366 (2.17) | 4.778 to 13.41 | 0.002 | 12.39 (1.397) | 10.45 to 15.72 | 0.008 |
| var eccent | Activity | 19.6 | 8.595 (2.251) | 5.068 to 13.99 | 0.004 | 12.48 (1.362) | 10.52 to 15.63 | 0.002 |
| var eccent | Tech | 19.15 | 27.14 (7.831) | 16.93 to 46.5 | 0.202 | 20.19 (3.709) | 14.95 to 29.94 | 0.894 |
| var eccent | Regs | 22.85 | 30.48 (9.694) | 18.21 to 57.39 | 0.392 | 19.87 (3.483) | 15.04 to 28.13 | 0.342 |
| var eccent | Finance | 17 | 8.884 (2.249) | 5.369 to 14.09 | 0.014 | 12.74 (1.405) | 10.65 to 16.2 | 0.03 |
| var eccent | Crew | 24.46 | 19.43 (5.77) | 11.87 to 34.63 | 0.264 | 16.87 (2.629) | 13.3 to 23.2 | 0.022 |

**Table S3. Measures of network structure with statistics describing the out-degree assortativity coefficient (out assort), mean node eccentricity (mean eccent) and variance in node betweenness (var between).** Table includes the observed statistic and the statistic from the permutations as the mean, sd, 95% range from 2.5% (lq) to 97.5% (uq), and the p value (when compared to the observed stat).

| stat | network | obs1 | mean.sd.1 | lq.uq.1 | p1 | mean.sd.2 | lq.uq.2 | p2 |
| --- | --- | --- | --- | --- | --- | --- | --- | --- |
| out assort | turtle | -0.0563 | -0.008 (0.0614) | -0.1223 to 0.1124 | 0.424 | -0.0208 (0.0576) | -0.1297 to 0.0968 | 0.534 |
| out assort | gear | 0.0205 | -0.004 (0.049) | -0.0981 to 0.0937 | 0.584 | -0.0055 (0.0471) | -0.0983 to 0.0882 | 0.544 |
| out assort | weather | 0.0517 | -0.0078 (0.0475) | -0.1025 to 0.0854 | 0.212 | -0.0044 (0.0471) | -0.1021 to 0.0911 | 0.226 |
| out assort | loc | 0.0129 | -0.0078 (0.05) | -0.1028 to 0.0914 | 0.65 | -0.0091 (0.0465) | -0.1004 to 0.0794 | 0.626 |
| out assort | activ | 0.0152 | -0.0039 (0.0506) | -0.1043 to 0.1003 | 0.662 | -0.0082 (0.046) | -0.0926 to 0.0818 | 0.628 |
| out assort | tech | 0.0425 | -0.0095 (0.055) | -0.1145 to 0.1023 | 0.36 | -0.004 (0.0523) | -0.1058 to 0.0985 | 0.384 |
| out assort | regs | 0.0129 | -0.0049 (0.0592) | -0.119 to 0.1104 | 0.766 | -0.01 (0.0533) | -0.1103 to 0.0955 | 0.648 |
| out assort | financ | 0.0232 | -0.0053 (0.0481) | -0.0982 to 0.0863 | 0.58 | -0.0044 (0.0479) | -0.1062 to 0.0856 | 0.544 |
| out assort | capt | 0.0735 | -0.0057 (0.0529) | -0.1101 to 0.1018 | 0.13 | -0.0025 (0.0493) | -0.0998 to 0.0976 | 0.136 |
| mean eccent | turtle | 3.309 | 8.754 (1.498) | 5.988 to 11.82 | 0 | 4.63 (0.5432) | 3.776 to 5.867 | 0 |
| mean eccent | gear | 4.546 | 8.259 (0.6509) | 7.242 to 9.782 | 0 | 4.701 (0.2994) | 4.194 to 5.37 | 0.612 |
| mean eccent | weather | 5 | 8.28 (0.6363) | 7.285 to 9.813 | 0 | 4.708 (0.2935) | 4.254 to 5.352 | 0.26 |
| mean eccent | loc | 4.994 | 8.216 (0.674) | 7.157 to 9.808 | 0 | 4.735 (0.2826) | 4.261 to 5.376 | 0.336 |
| mean eccent | activ | 5.242 | 8.266 (0.6777) | 7.218 to 9.813 | 0 | 4.792 (0.2752) | 4.333 to 5.449 | 0.13 |
| mean eccent | tech | 4.358 | 9.346 (1.164) | 7.472 to 12.15 | 0 | 5.188 (0.4979) | 4.357 to 6.297 | 0.052 |
| mean eccent | regs | 4.461 | 9.576 (1.21) | 7.652 to 12.44 | 0 | 5.233 (0.4729) | 4.46 to 6.249 | 0.056 |
| mean eccent | financ | 4.933 | 8.259 (0.6506) | 7.242 to 9.891 | 0 | 4.809 (0.2827) | 4.291 to 5.431 | 0.572 |
| mean eccent | capt | 5.042 | 9.198 (0.9606) | 7.606 to 11.47 | 0 | 5.18 (0.4175) | 4.473 to 6.116 | 0.79 |
| var between | turtle | 55170 | 321700 (147600) | 61560 to 633200 | 0.042 | 147500 (38430) | 86450 to 234900 | 0 |
| var between | gear | 159300 | 285100 (39540) | 218300 to 375500 | 0 | 178100 (21950) | 140500 to 226800 | 0.376 |
| var between | weather | 214700 | 290400 (40420) | 223900 to 381500 | 0.016 | 182700 (20020) | 147900 to 224800 | 0.136 |
| var between | loc | 197800 | 280400 (42240) | 213200 to 372600 | 0.01 | 180200 (19870) | 143900 to 224500 | 0.344 |
| var between | activ | 239300 | 284800 (42540) | 215400 to 377400 | 0.264 | 184700 (20600) | 148500 to 228600 | 0.02 |
| var between | tech | 158600 | 428400 (108200) | 272400 to 700500 | 0 | 206500 (40180) | 143000 to 293500 | 0.18 |
| var between | regs | 129000 | 454000 (125800) | 275500 to 768900 | 0 | 214900 (38420) | 149300 to 305400 | 0.004 |
| var between | financ | 234000 | 286700 (40670) | 222700 to 378600 | 0.136 | 182200 (20930) | 144800 to 226000 | 0.034 |
| var between | capt | 174800 | 405800 (84840) | 282100 to 606900 | 0 | 215600 (32690) | 161400 to 287600 | 0.176 |

**Table S4. Measures of cross-network comparisons with statistics describing variance in node eccentricity (var eccent) and mean node eccentricity (mean eccent).** Table includes the observed statistic and the statistic from the permutations as the mean, sd, 95% range from 2.5% (lq) to 97.5% (uq), and the p value (when compared to the observed stat).

| stat | network | obs1 | mean.sd.1 | lq.uq.1 | p1 | mean.sd.2 | lq.uq.2 | p2 |
| --- | --- | --- | --- | --- | --- | --- | --- | --- |
| var eccent | turtle | 14.71 | 31.63 (10.14) | 16.98 to 56.19 | 0.02 | 30.91 (10.73) | 15.05 to 59.44 | 0.038 |
| var eccent | gear | 16.24 | 16.74 (1.665) | 13.95 to 20.67 | 0.874 | 16.72 (1.661) | 14.04 to 20.62 | 0.926 |
| var eccent | weather | 19.28 | 16.26 (1.372) | 13.96 to 19.57 | 0.058 | 16.33 (1.449) | 13.94 to 19.76 | 0.088 |
| var eccent | loc | 18.96 | 16.13 (1.282) | 13.94 to 19.36 | 0.06 | 16.09 (1.308) | 13.89 to 19.38 | 0.074 |
| var eccent | activ | 19.6 | 16.07 (1.207) | 13.92 to 18.98 | 0.034 | 15.98 (1.247) | 13.9 to 19.2 | 0.042 |
| var eccent | tech | 19.15 | 28.23 (6.785) | 18.65 to 45.21 | 0.07 | 28.42 (7.11) | 18.88 to 47.12 | 0.068 |
| var eccent | regs | 22.85 | 29.16 (7.625) | 17.81 to 47.81 | 0.338 | 29.18 (8.034) | 18.08 to 51.99 | 0.382 |
| var eccent | financ | 17 | 16.66 (1.606) | 14.07 to 20.22 | 0.75 | 16.76 (1.651) | 13.98 to 20.8 | 0.8 |
| var eccent | capt | 24.46 | 24.1 (4.986) | 17.49 to 35.94 | 0.774 | 24.17 (4.963) | 17.3 to 34.21 | 0.786 |
| mean eccent | turtle | 3.309 | 4.831 (0.7783) | 3.491 to 6.455 | 0.022 | 4.771 (0.824) | 3.381 to 6.498 | 0.04 |
| mean eccent | gear | 4.546 | 4.824 (0.2212) | 4.424 to 5.285 | 0.216 | 4.824 (0.221) | 4.418 to 5.321 | 0.182 |
| mean eccent | weather | 5 | 4.786 (0.1861) | 4.442 to 5.2 | 0.238 | 4.796 (0.1884) | 4.442 to 5.218 | 0.262 |
| mean eccent | loc | 4.994 | 4.786 (0.1698) | 4.46 to 5.188 | 0.202 | 4.779 (0.177) | 4.442 to 5.182 | 0.208 |
| mean eccent | activ | 5.242 | 4.776 (0.1616) | 4.46 to 5.134 | 0.03 | 4.765 (0.1657) | 4.448 to 5.127 | 0.03 |
| mean eccent | tech | 4.358 | 5.207 (0.5926) | 4.194 to 6.492 | 0.102 | 5.208 (0.5861) | 4.206 to 6.485 | 0.102 |
| mean eccent | regs | 4.461 | 5.194 (0.6411) | 4.024 to 6.558 | 0.212 | 5.184 (0.6511) | 4.073 to 6.661 | 0.228 |
| mean eccent | financ | 4.933 | 4.817 (0.2121) | 4.448 to 5.267 | 0.522 | 4.831 (0.216) | 4.436 to 5.328 | 0.548 |
| mean eccent | capt | 5.042 | 5.152 (0.4853) | 4.351 to 6.285 | 0.904 | 5.159 (0.4691) | 4.364 to 6.103 | 0.852 |

**Social network analysis questionnaire (English)**

**Individual socio-demographic information**

First, I’m going to ask you a few questions about yourself. Note that your individual responses to this survey will remain confidential and we will only use the data collected in aggregate form.

**Survey ID Date**

**Full name Nickname**

**Gender** 🔾 Male 🔾 Female

**Fisher / decision maker status:** 🔾Skipper 🔾Vessel owner 🔾Skipper AND Owner

**Plate number Name of boat**

**Q1)** What is your age? _________________

**Q2)** Do you live in San José. Y________ yrs., N, where do you live? _______________region / city

**Q3)** If < 5 years, where did you live before and why did you move here? _______________________

**Q4)** What generation of gillnet fisherman in San Jose are you? ________________

**For boat owners that are not skippers:**

**Q5)** Were you formally a gillnet captain**?**

No

Yes (please specify when you stopped fishing) ______________________

**Q6)** Which best describes your situation:

My family fish with my boat as we divide the profits evenly. Or some other percentage______

I hire my boat to non-family members and receive a percentage of the catch profit: ________

**For skippers and skippers AND boat owners**

**Q7)** How many years have you been fishing? ____________________________________________

**Q8)** Do you launch or land at any other ports?

No

Yes (please specify) ______________________

**Q9)** During which months did you not fish last year? _______________________________________

**Q10)** What is the principal net that you use? Trammel, Lineal, Other: ____________________

- Surface / driftnet
- Mid-water net
- Bottom net
- Other net type (please specify) ____________________

**Q11)** Do you ever switch net types from your main net type?

- No
- Yes (please explain to what, and under what circumstances) _________________________

_____________________________________________________________________________

**Q12)** What are you three main target species?

1. _________________________________

2. _________________________________

3. _________________________________

**For everyone:**

**Q13)** Which of the following best describes you?

- President of a gremio / social group (which) ____________________
- Board member of a gremio / social group (which) ____________________
- Member of gremio / social group (which) ____________________
- I’m not a member of any gremio / social group (Individual owner operator)

**Q14)** What is your highest level of education?

- No formal education
- Primary school, please specify if completed _________________
- Secondary school, please specify if completed _________________
- Trade or technical certificate / fishing course, please specify if completed _______________
- University degree, please specify if completed _________________

**[Personal income]**

**Q15)** Is fishing your primary occupation/source of income?

Yes

No (please specify what is) ___________________________________________________

**Q16)** How much do you spend on fishing trips per month (on average)?

Summer_____ Winter_____

**Q17)** How many days a month (in average) do you spend on fishing trip?

Summer**____** Winter**____**

**Q18)** What is your take-home monthly income (in soles) after all expenses in:

Summer: Max: ___________ Winter: Max: ____________

Average: ________ Average: _________

Min: ____________Min: ____________

**[Household income]**

**Q19)** Which of the following household descriptions best fits you?

- Couple with children – with some children still living at home
- Couple with children – with all children having left home
- Couple without children
- Single with children
- Single without children

**Q20)** Are you the main wage earner in your household?

- No
- Yes

**Q21)** How many people are currently living in your household? ______________________________

**Q22)** Of these, how many are fishermen? ______________________________

**Q23)** Are there any other wage earners in your household that are not fishermen?

- No
- Yes (what jobs do they do?) ___________________________________________________

**Q24)** What percentage of your household income (including all wage earners) comes from fishing?

| 🔾 0-20% | 🔾 21-40% | 🔾 41-60% | 🔾 61-80% | 🔾 81-100% | 🔾All | 🔾Don’t know / rather not say |
| --- | --- | --- | --- | --- | --- | --- |

**Section B: Social Network Analysis structured questionnaire**

We need you to think about the people from San Jose that you share useful information about fisheries with; consider those you think may influence your fishing success. Remember that the shared information and names will remain anonymous and will not be revealed. This will help us understand how the information flows between fishermen.

Please consider relationships that you have had with other vessel owners, captains, owner/captains (owners who also captain their vessel), other fishery leaders, fishery management officials, members of the scientific or NGO community, boat launching / landing support, fish transport associations, fish sellers/market operators, your family and friends, and any other people you have fished with, or shared information with about fishing over the last 5 years.

**Q25)** Please identify up to 10 individuals (providing first and last names, and known nicknames) that you *exchange useful information* with about fishing that you consider *valuable to your fishing success*.

| Full name | | Nickname | Rel | Crew | Meet | tMeet | Often | Topic of conversation | | | | | | | | | Value |
| --- | --- | --- | --- | --- | --- | --- | --- | --- | --- | --- | --- | --- | --- | --- | --- | --- | --- |
| I | II | III | IV | V | VI | VII | VIII | IX |
| 1 |  |  |  |  |  |  |  |  |  |  |  |  |  |  |  |  |  |
| 2 |  |  |  |  |  |  |  |  |  |  |  |  |  |  |  |  |  |
| 3 |  |  |  |  |  |  |  |  |  |  |  |  |  |  |  |  |  |
| 4 |  |  |  |  |  |  |  |  |  |  |  |  |  |  |  |  |  |
| 5 |  |  |  |  |  |  |  |  |  |  |  |  |  |  |  |  |  |
| 6 |  |  |  |  |  |  |  |  |  |  |  |  |  |  |  |  |  |
| 7 |  |  |  |  |  |  |  |  |  |  |  |  |  |  |  |  |  |
| 8 |  |  |  |  |  |  |  |  |  |  |  |  |  |  |  |  |  |
| 9 |  |  |  |  |  |  |  |  |  |  |  |  |  |  |  |  |  |
| 10 |  |  |  |  |  |  |  |  |  |  |  |  |  |  |  |  |  |

Rel = Relation: A) Professional acquaintance, B) Friend, C) Family

Crew = Crew member: Y / N

Meet = How did you meet: A) family member, B) through a friend, C) through fishing, D) from a family member, E) Other: ________________

tMeet = How long have you known this person: A) <1 yr, B) 1-5 yrs, C) >5 yrs

Often = How often do you share useful information about aspects of fishing with this person? A) 1-3 times/yrs, B) 1-3 times/month, C) 1-3 times/week or more

I: Gear type (i.e. Changes, technology, maintenance)

II: Weather conditions

III: Fish location / catch sites

IV: Fishing activity (How many people fishing, who is fishing, who caught what, etc.)

V: Turtle bycatch

VI: Vessel technology / maintenance

VII: Fishery regulations (laws, rules)

VIII: Fishing finances (market prices, loans, fines, penalties)

IX: Hiring new crew / captain

Value: In general, how valuable do you feel the information that you exchange with this individual is to your fishing success? A) Very valuable, B) somewhat valuable, C) a little valuable

To finish up with the network analysis, I have four more questions on bycatch and new gear uptake

**Q26)** Which of the people you’ve identified is the most influential to you when you are considering making changes to your fishing gear?

**Q27)** Which of the people you've identified is the most influential to you in (potentially) deciding about changing the way you fish (e.g. changing your behaviour such as shorter soak time)?

**Q28)** What do you think about taking on new technologies to reduce bycatch of turtles and dolphins? (-1 Negative, 0 Neutral, +1 Positive)

**Q29)** Are you aware of the work that the NGO ProDelphinus is undertaking with a few fishermen here in San Jose to help reduce the number of turtles and dolphins that are captured in nets? Do you know about the technologies that they are using?

**Q30)** Do you think the Orca underwater acoustic alarm used to deter dolphins attract sea lions to your nets?

- No
- Yes
- I don’t know

**Q31)** Do you think lights on your nets to deter turtles attract sea lions to your nets?

- No
- Yes
- I don’t know

If you have any comments on this survey or about information sharing between fishermen within the San José community, please tell us or write them below.

Thank you very much for your time and help in this survey

**Social network analysis questionnaire (Spanish)**

**Información socio-demográfica individual**

Primero, voy a preguntarte acerca de ti. Ten en cuenta que las respuestas individuales en esta encuesta se mantendrán confidenciales y solo usaremos la información de forma agregada.

**ID de la encuesta Fecha**

**Nombre completo Apodo**

**Género** 🔾 Masculino 🔾 Femenino

**Estado en toma de decisiones:** 🔾Patrón 🔾Dueño de embarcación 🔾Ambos

**Número de matrícula Nombre de la embarcación**

**Q1)** ¿Cuál es tu edad?______________________

**Q2)** ¿Vives aquí? Y _________ yrs, N____________________ región / ciudad

**Q3)** Si < 5 años, ¿dónde vivías antes y por qué te mudaste aquí? ____________________________

**Q4)** ¿Qué generación de pescador de redes de enmalle de San José eres tú? __________________

**Para dueños de embarcaciones que no son PATRONES.**

**Q5) ¿**Fuiste alguna vez formalmente un patrón**?**

No

Si (¿hace cuantos años dejaste de pescar?) ______________________

**Q6)** ¿Cuál describe mejor tu situación?:

Mi familia pesca con mi bote, dividimos las ganancias igual. Otro porcentaje? ____________

Rento mi bote a un ajeno y recibo un porcentaje de la ganancia, cuanto? ________________

**Solo para PATRONES y PATRONES que son ARMADORES**

**Q7)** ¿Cuántos años llevas pescando? __________________________

**Q8)** ¿Embarcas o desembarcas de otros puertos?

No

Sí (por favor especifica) ______________________

**Q9)** ¿En que meses descansaste el año pasado? _________________________________________

**Q10)** ¿Cuál es el tipo principal de red de enmalle que usas? Trasmallo, Lineal Otro:______________

- Red de superficie / red de deriva
- Red de mediagua
- Red de fondo
- Otro tipo de red (por favor especifica) ____________________

**Q11)** ¿Cambias tu tipo de red principal por otros?

- No
- Sí (por favor especifica a qué, y debido a qué) _________________________

_________________________________________________________________

**Q12)** ¿Cuáles son tus 3 objetivos principales de pesca?

1. _________________________________

2. _________________________________

3. _________________________________

**Para todos**

**Q13)** ¿Cuál de los siguientes te describe mejor?

- Presidente de un gremio / grupo social (cuál) _____________________________________
- Miembro de consejo de gremio / grupo social (cuál) _________________________________
- Miembro de gremio / grupo social (cuál)_____________________________________
- No soy agremiado / no pertenezco a grupos sociales (Dueño operador individual)

**Q14) ¿**Cuál es tu nivel educativo?

- Sin educación formal
- Primaria (por favor especificar si completó)__________________
- Secundaria (por favor especificar si completó)__________________
- Técnico / capacitado en pesca (por favor especificar si completó)__________________
- Universitario (por favor especificar si completó)__________________

**[Ingresos personales]**

**Q15)** ¿Es la pesca tu principal ocupación / fuente de ingresos?

Sí

No (por favor especifica cuál es) ____________

**Q16)** Cuánto es el gasto promedio mensual en viajes en:

Verano_________, Invierno____________

**Q17)** Cuántos días (promedio) te embarcas al mes en:

Verano_________, Invierno____________ .

**Q18)** ¿Cuál es el ingreso mensual promedio (después de costos) que obtienes en:

Verano: Bueno: __________ Invierno: Bueno: ____________

Medio: __________ Medio: ____________

Bajo: ___________Bajo: ______________

**[Ingresos familiares]**

**Q19)** ¿Cuál de las siguientes descripciones familiares se aplica a ti?

- Pareja con hijos – con algunos de los hijos viviendo en el hogar
- Pareja con hijos – con todos los hijos fuera del hogar
- Pareja sin hijos
- Soltero sin hijos
- Soltero con hijos

**Q20)** ¿Eres el sustento económico principal de tu hogar?

- No
- Sí

**Q21)** ¿Cuántas personas viven actualmente en tu hogar?___________________________________

**Q22)** De ellos, ¿cuántos son pescadores? _________________________________

**Q23)** ¿Existen otros proveedores de sustento económico en tu hogar que no sean pescadores?

- No
- Sí (¿qué trabajos realizan?) ___________________________________________________

**Q24)** ¿Qué porcentaje del ingreso de tu hogar (incluyendo a todos los que proven) proviene de la pesca?

| 🔾 0-20% | 🔾 21-40% | 🔾 41-60% | 🔾 61-80% | 🔾 81-100% | 🔾Todos | 🔾 No se / Preferiria no decirlo |
| --- | --- | --- | --- | --- | --- | --- |

**Sección B: Cuestionario estructurado de Análisis de Red Social**

Piensa con quienes intercambias INFORMACION UTIL de pesca en San Jose y que sientes que PODRIA INFLUENCIAR en que te vaya bien en la pesca. Los nombres y la informacion que des se mantendran en anonimato y no sera revelada. Esto servira para saber como fluye la informacion entre pescadores.

Recuerda a: otros dueños de embarcaciones, capitanes, otros líderes pesqueros, oficiales de manejo pesquero, científicos o ONGs, embarcadores/ayudantes de embarque y desembarque, asociaciones de chalaneros, vendedores de pescado/operadores de mercado, tu familia y amigos, y todas las otras personas con las que hayas pescado o compartido información de pesca en los últimos 5 años.

**Q25**) **Social Network Analysis questionnaire (Spanish).** Por favor identifica hasta 10 individuos (nombres y apellidos, no solo apodos) con los que *intercambias información útil* acerca de la pesca que consideres *valioso para tu éxito pesquero*.

| Nombre completo | | Apodo | Rel | Crew | Meet | tMeet | Often | Tema de conversaciòn | | | | | | | | | Valor |
| --- | --- | --- | --- | --- | --- | --- | --- | --- | --- | --- | --- | --- | --- | --- | --- | --- | --- |
| I | II | III | IV | V | VI | VII | VIII | IX |
| 1 |  |  |  |  |  |  |  |  |  |  |  |  |  |  |  |  |  |
| 2 |  |  |  |  |  |  |  |  |  |  |  |  |  |  |  |  |  |
| 3 |  |  |  |  |  |  |  |  |  |  |  |  |  |  |  |  |  |
| 4 |  |  |  |  |  |  |  |  |  |  |  |  |  |  |  |  |  |
| 5 |  |  |  |  |  |  |  |  |  |  |  |  |  |  |  |  |  |
| 6 |  |  |  |  |  |  |  |  |  |  |  |  |  |  |  |  |  |
| 7 |  |  |  |  |  |  |  |  |  |  |  |  |  |  |  |  |  |
| 8 |  |  |  |  |  |  |  |  |  |  |  |  |  |  |  |  |  |
| 9 |  |  |  |  |  |  |  |  |  |  |  |  |  |  |  |  |  |
| 10 |  |  |  |  |  |  |  |  |  |  |  |  |  |  |  |  |  |

Rel = Relacion: A) Profesional conocido, B) Amigo, C) Familiar

Crew = Colega-tripulante, Y / N

Meet = Como lo conociste: A) familiar, B) por un amigo, C) a traves de la pesca, D) por un familiar, E) OTRO:___________________________

tMeet = Cuanto tiempo lo conoces: A) <1 año, B) 1-5 años, C) >5 años

Often = Que tan seguido comparten info: A) 1-3 veces/año, B) 1-3 veces/mes, C) 1-3 veces/semana o más

I: tipo de arte (i.e. cambios, tecnologia, mantenimiento)

II: condiciones climaticas

III: ubicacion de los peces y sitios de captura

IV: actividad pesquera (cuanto, quienes estan pescando, que estan pescando, quien cogio que, etc.)

V: Captura incidental de tortuga

VI: tecnologia y mantenimiento de la nave

VII: regulaciones pesqueras (leyes, reglas)

VIII: finanza pesquera (precios del Mercado, prestamos, multas, penalidades)

IX: Contratacion de tripulantes o capitan

Value: Que tan valiosa es la informacion que intercambias: A) muy valiosa, B) algo valiosa, C) un poco valiosa

Solo para terminar el análisis de red social, tengo cuatro preguntas más acerca de pesca incidental y aceptación de nuevos artes de pesca.

**Q26)** ¿Cuál de las personas que has identificado es la más influyente para ti cuando se trata de hacer cambios en los artes de pesca?

**Q27)** ¿Cuál de las personas que has identificado es la más influyente para ti en (potencialmente) decidir cambiar la forma en la que pescas (e.g. cambiar el momento y duracion que pones la red)?

**Q28)** ¿Qué opinas de adoptar nuevas tecnologias para reducir la captura incidental de tortugas y delfines? (-1 , 0 , +1)

**Q29)** ¿Estás al tanto del trabajo que la ONG ProDelphinus viene llevando a cabo con un pequeño grupo de pescadores aquí en San José para ayudar a reducir el número de tortugas y delfines que son capturados en las redes? Conoces las tecnologias que usan?

Si tienes comentarios acerca de esta encuesta por favor dinos o escríbelos en el cuadro.

Muchas gracias por tu tiempo y colaboración con esta encuesta

**Supplementary literature cited**

1. Castillo G., Fernandez J., Medina A., Guevara-Carrasco R. 2018 Third structural survey of the artisanal fishery in the Peruvian littoral. *Informe IMARPE* **45**(3), 299-388.

2. Alfaro‐Shigueto J., Mangel J.C., Bernedo F., Dutton P.H., Seminoff J.A., Godley B.J. 2011 Small‐scale fisheries of Peru: a major sink for marine turtles in the Pacific. *J Appl Ecol* **48**(6), 1432-1440.

3. Alfaro-Cordova E., Del Solar A., Alfaro-Shigueto J., Mangel J., Diaz B., Carrillo O., Sarmiento D. 2017 Captures of manta and devil rays by small-scale gillnet fisheries in northern Peru. *Fish Res* **195**, 28-36.

4. Mangel J.C., Alfaro-Shigueto J., Van Waerebeek K., Cáceres C., Bearhop S., Witt M.J., Godley B.J. 2010 Small cetacean captures in Peruvian artisanal fisheries: high despite protective legislation. *Biol Conserv* **143**(1), 136-143.

5. Alfaro-Shigueto J., Mangel J., Valenzuela K., Arias-Schreiber M. 2016 The intentional harvest of waved albatrosses Phoebastria irrorata by small-scale offshore fishermen from Salaverry port, Peru. *Pan-Am J Aqua Sci* **11**(1), 70-77.

6. Arlidge W.N.S., Squires D., Alfaro-Shigueto J., Booth H., Mangel J.C., Milner-Gulland E.J. 2020 A Mitigation Hierarchy Approach for Managing Sea Turtle Captures in Small-Scale Fisheries. *Front Mar Sci* **7**(49). (doi:10.3389/fmars.2020.00049).

7. Wallace B.P., DiMatteo A.D., Hurley B.J., Finkbeiner E.M., Bolten A.B., Chaloupka M.Y., Hutchinson B.J., Abreu-Grobois F.A., Amorocho D., Bjorndal K.A. 2010 Regional management units for marine turtles: a novel framework for prioritizing conservation and research across multiple scales. *PLoS ONE* **5**(12), e15465.

8. Ortiz N., Mangel J.C., Wang J., Alfaro-Shigueto J., Pingo S., Jimenez A., Suarez T., Swimmer Y., Carvalho F., Godley B. 2016 Reducing green turtle bycatch in small-scale fisheries using illuminated gillnets: The Cost of Saving a Sea Turtle. *Marine Ecological Progress Series* **545**, 251–259.

9. Bartholomew D.C., Mangel J.C., Alfaro-Shigueto J., Pingo S., Jimenez A., Godley B.J. 2018 Remote electronic monitoring as a potential alternative to on-board observers in small-scale fisheries. *Biol Conserv* **219**, 35-45.

10. Alfaro-Shigueto J., Mangel J.C., Pajuelo M., Dutton P.H., Seminoff J.A., Godley B.J. 2010 Where small can have a large impact: structure and characterization of small-scale fisheries in Peru. *Fish Res* **106**(1), 8-17.

11. Escudero H.L. 1997 Encuesta estructural de la pesquería artesanal del litoral peruano. (IMARPE.

12. Newman M.E.J. 2010 *Networks : an introduction*. Oxford; New York, Oxford University Press.

13. Bejder L., Fletcher D., Bräger S. 1998 A method for testing association patterns of social animals. *Anim Behav* **56**(3), 719-725.
